# Rate of Evolution in Brain-Expressed Genes in Humans and Other Primates

Hung-Yi Wang<sup>1,2<sup>‡</sup></sup>, Huan-Chieh Chien<sup>1</sup>, Naoki Osada<sup>3</sup>, Katsuyuki Hashimoto<sup>4</sup>, Sumio Sugano<sup>5</sup>, Takashi Gojobori<sup>6</sup>, Chen-Kung Chou<sup>7</sup>, Shih-Feng Tsai<sup>8</sup>, Chung-I Wu<sup>2\*</sup>, C.-K. James Shen<sup>1\*</sup>

**1** Institute of Molecular Biology, Academia Sinica, Taipei, Taiwan, **2** Department of Ecology and Evolution, University of Chicago, Chicago, Illinois, United States of America, **3** Division of Biomedical Research Resources, National Institute of Biomedical Innovation, Osaka, Japan, **4** Division of Genetic Resources, National Institute of Infectious Diseases, Tokyo, Japan, **5** Laboratory of Functional Genomics, Department of Medical Genome Sciences, Graduate School of Frontier Sciences, University of Tokyo, Tokyo, Japan, **6** Center of Information Biology, National Institute of Genetics, Mishima, Japan, **7** Department of Life Science, Chang Gung University, Tao-Yuan, Taiwan, **8** Division of Molecular and Genomic Medicine, National Health Research Institute, Miaoli, Taiwan

**Brain-expressed genes are known to evolve slowly in mammals. Nevertheless, since brains of higher primates have evolved rapidly, one might expect acceleration in DNA sequence evolution in their brain-expressed genes. In this study, we carried out full-length cDNA sequencing on the brain transcriptome of an Old World monkey (OWM) and then conducted three-way comparisons among (i) mouse, OWM, and human, and (ii) OWM, chimpanzee, and human. Although brain-expressed genes indeed appear to evolve more rapidly in species with more advanced brains (apes > OWM > mouse), a similar lineage effect is observable for most other genes. The broad inclusion of genes in the reference set to represent the genomic average is therefore critical to this type of analysis. Calibrated against the genomic average, the rate of evolution among brain-expressed genes is probably lower (or at most equal) in humans than in chimpanzee and OWM. Interestingly, the trend of slow evolution in coding sequence is no less pronounced among brain-specific genes, vis-à-vis brain-expressed genes in general. The human brain may thus differ from those of our close relatives in two opposite directions: (i) faster evolution in gene expression, and (ii) a likely slowdown in the evolution of protein sequences. Possible explanations and hypotheses are discussed.**

Citation: Wang HY, Chien HC, Osada N, Hashimoto K, Sugano S, et al. (2007) Rate of evolution in brain-expressed genes in humans and other primates. *PLoS Biol* 5(2): e13. doi:10.1371/journal.pbio.0050013

## Introduction

The brain is a most complex and fascinating organ in mammals [1]. It has been the focal point of comparative studies among primates and mammals [2,3]. Recent developments in molecular, cellular, and cognitive methods have significantly advanced the comparative approach [4,5]. Because earlier studies have shown rapid sequence evolution in some genes in association with the rapid evolution in phenotypes [6,7], it seems natural to expect rapid molecular evolution in brain-expressed genes in humans as well.

As brain-specific genes in mammals have been shown to exhibit a lower rate of evolution than genes expressed in other tissues [8–10], the question is whether that trend is reversed in the human lineage, or whether it is accentuated in the descent of humans. The hypothesis that sequence evolution might have sped up in humans has been bolstered by the observation of rapid evolution in the expression levels of genes in the human brain [5,11]. A recent study has indeed reached such a conclusion on sequence evolution [12]. Because this study was based on comparison with a small set of “housekeeping genes,” the possibility that the control group, rather than the brain-expressed genes, deviate from the norm has to be carefully evaluated.

For comparative studies, we obtained high-quality full-length cDNAs from the brain of an Old World monkey (OWM) (a cynomolgus monkey, *Macaca fascicularis*) for two reasons. First, the OWM is well positioned for two types of three-way comparisons: mouse–OWM–human and OWM–human–chimpanzee. Second, high-quality brain cDNAs can be ethically obtained from OWMs under controlled con-

ditions. We sequenced clones of full-length cDNA libraries from different regions of the brain (frontal lobe, temporal lobe, occipital lobe, and brain stem; see Protocol S1).

## Results

### Cloning and Sequencing of Brain-Expressed Genes in the Cynomolgus Monkey

In total, 60,000 cDNA clones were subjected to 5′-end sequencing, and 19,400 different transcription units were identified. Among these transcription units, 4,600 clones were randomly chosen for full-insert sequencing. The average length of these cDNAs after sequencing was 1,770 bp. Among them, 65%, or 2,996, matched RefSeq entries. The rest of the sequences matched either human expressed sequence tags or human genomic sequences. With redundancy excluded, the

**Academic Editor:** Kenneth H. Wolfe, University of Dublin, Ireland

**Received** May 23, 2006; **Accepted** November 10, 2006; **Published** December 26, 2006

**Copyright:** © 2007 Wang et al. This is an open-access article distributed under the terms of the Creative Commons Attribution License, which permits unrestricted use, distribution, and reproduction in any medium, provided the original author and source are credited.

**Abbreviations:** CDS, coding sequence; Consortium, Chimpanzee Sequencing and Analysis Consortium; Ka, number of substitutions per site for nonsynonymous sites; Ks, number of substitutions per site for synonymous sites; OWM, Old World monkey

\* To whom correspondence should be addressed. E-mail: ciwu@uchicago.edu (CIW); ckshen@ccvax.sinica.edu.tw (CKJS)

<sup>‡</sup> Current address: Graduate Institute of Clinical Medicine, National Taiwan University, Taipei, Taiwan

## Author Summary

Whether comparing morphology or cognitive ability, it is clear that the human brain has evolved rapidly relative to that of other primates. But the extent to which genes expressed in the brain also reflect this overall pattern is unclear. To address this question, it's necessary to measure any variations in the DNA sequences of these genes between human and chimpanzee. And, to do this as accurately as possible, it's also important to require an appropriate reference group to act as a benchmark against which the differences can be measured. We therefore compared publicly available genomic sequences of chimps and humans with complementary DNA sequences of several thousand genes expressed in the brain of another closely related primate—the macaque, an Old World monkey—as well as the more distantly related mouse. Our analyses of the rates of protein evolution in these species suggest that genes expressed in the human brain have in fact slowed down in their evolution since the split between human and chimpanzee, contrary to some previously published reports. We suggest that advanced brains are driven primarily by the increasing complexity in the network of gene interactions. As a result, brain-expressed genes are constrained in their sequence evolution, although their expression levels may change rapidly.

number of protein-coding sequences in our dataset was 2,498, with the average coding sequence (CDS) being 335 codons in length. Most of the sequences (1,774, or 75%) had more than 50% of their length in CDS. These cDNA sequences played a central role in delineating the brain-expressed genes analyzed in this report.

In this dataset, 2,170 (87%) of the cDNAs matched at least one of the functional categories, the top 19 of which are listed in Table S1. Brain appears to express more genes in the categories of intracellular protein traffic and protein targeting and localization, but fewer genes in the categories of developmental process and cell proliferation/differentiation, when compared with the genome-wide distribution. This is consistent with the known functional requirements of the mammalian brain [13].

### Brain-Expressed Genes Have Evolved More Slowly Than Other Genes in the Genome

We calculated the number of substitutions per site for synonymous sites (Ks) and nonsynonymous sites (Ka) for each brain cDNA and the genome-wide collections of CDSs of mouse and rhesus monkey (*M. mulatta*). The averages are given in Table 1. The cDNA samples were collected from four different regions of the brain, and although the evolutionary rates varied somewhat among different regions (Table S2), the differences were not significant. Therefore, genes from different regions were pooled in the following evolutionary analyses.

The average Ka/Ks ratio for brain cDNAs was 0.133 and 0.087 for the human–OWM and human–mouse comparisons, respectively. We also calculated genome-wide Ka/Ks ratios for the same comparisons (0.177 and 0.138, respectively), as shown in Table 1. The Ka/Ks ratio among brain-expressed genes was significantly smaller than the genomic average ( $p < 10^{-3}$ ; see Materials and Methods). Furthermore, calculation of Ka/Ks ratio for each of 19 functional categories suggests that this slower evolution among brain-expressed genes is “global” across all functional categories (Figure S1). An exception are

the genes of “electron transport,” which appear to have evolved unusually fast in the human–OWM comparison. In this category of genes, the subunits of COX and the electron transport chain components have previously been documented to be fast evolving [14–16].

Another important point (the relevance of which will become clear in the Discussion) is that the slower evolution reported here was true for both brain-expressed genes and brain-specific genes, the latter being expressed exclusively or mainly in the brain. In general, tissue-specific genes evolve more rapidly than non-tissue-specific genes [10] as the latter are expected to experience broader selective constraints. This trend apparently is not true among brain-expressed genes identified by microarray hybridization experiments. In Figure 1, we compare genes expressed in any combination of brain, muscle, and liver (see Materials and Methods). Genes are classified into seven categories—those expressed in only one of the three tissues, those expressed in two of the three tissues (three categories for each), and those expressed in all three tissues (one category). Genes expressed in the brain tended to have a lower Ka/Ks, and genes that are expressed only in the brain, but not in the liver or muscle, had the lowest Ka/Ks. This observation is in agreement with Khaitovich et al.'s [17] recent study. The set of genes expressed in both brain and liver had the highest Ka/Ks among the brain-expressed gene categories, but this set was also the smallest and, hence, least statistically informative.

### Apparent Faster Evolution of Brain-Expressed Genes in Humans in the Absence of Calibration

We next calculated the number of lineage-specific substitutions as shown in Figure 2A (human versus OWM, with mouse as the outgroup) and Figure 2B (human versus chimpanzee, with OWM as the outgroup). To separate synonymous and nonsynonymous substitutions, we used the method of Yang [18]. The rates of protein evolution among brain-expressed genes for human and OWM lineages are not significantly different (Ka/Ks = 0.122 versus 0.113; see Table 2 and Figure 2A). The rate along the mouse lineage, at 0.092, is significantly lower than those in the other two lineages ( $p < 10^{-2}$ ).

Because humans and OWMs have been separated from each other for more than 30 million years, changes in the last few million years in, say, the human lineage would be difficult to detect. To see the lineage effects more clearly, we used the smaller phylogeny of Figure 2B among human, chimpanzee, and OWM. In this comparison, Ka/Ks ratios in both the human and chimpanzee lineages are higher than that along the OWM lineage (about 0.160 versus 0.130;  $p < 10^{-4}$ ; see Table 3 and Figure 2B). Note that Figure 2 depicts unrooted trees and the line to the outgroup (mouse or OWM) depicts the distance from the common ancestor of human/OWM or human/chimpanzee to mouse or OWM, respectively.

Figure 2 appears to support the simple expectation, based on the phenotypic divergence of the brains, that the rate of molecular evolution follows the order apes > OWM > mouse. This conclusion is of course tentative, as it is necessary to have a proper calibration against a group of reference genes (i.e., non-brain-expressed genes). Not surprisingly, this calibration is where most studies diverge. For example, if the set of reference genes is small, one may mistakenly conclude there has been rapid evolution of brain-expressed

**Table 1.** The Ka and Ks Values for Genes Expressed in the Brain Versus for All Genes in the Genome

| Comparison             | Origin      | Number of Genes | Ka × 100 (S.E.) | Ks × 100 (S.E.) | Ka/Ks    |
|------------------------|-------------|-----------------|-----------------|-----------------|----------|
| Human-OWM <sup>a</sup> | Brain       | 2,498           | 0.80 (0.009)    | 6.01 (0.035)    | 0.133*** |
|                        | Genome-wide | 14,204          | 1.19 (0.005)    | 6.73 (0.023)    | 0.177    |
| Human-Mouse            | Brain       | 2,078           | 4.79 (0.022)    | 54.79 (0.142)   | 0.087*** |
|                        | Genome-wide | 12,052          | 8.60 (0.016)    | 62.47 (0.131)   | 0.138    |

<sup>a</sup>For brain-expressed genes, OWM sequences were recovered from *M. fascicularis* brain cDNA libraries. OWM sequences in genome-wide comparison were derived from *M. mulatta* genome.

\*\*\*,  $p < 0.001$ ; comparison of Ka/Ks values of brain-expressed genes to the genome-wide average (See Materials and Methods for test details).

S. E., standard error.

doi:10.1371/journal.pbio.0050013.t001

genes when, in fact, it is the reference genes that have evolved slowly (In a previous study, Dorus et al. used only 99 slowly evolving genes for reference [12].) In what follows, we used either 4,840 or 14,204 genes as the genomic average for reference.

### Slower Evolution of Brain-Expressed Genes in Humans, Calibrated against the Genomic Average

To calibrate the distant phylogenetic comparisons of Figure 2A among human, OWM, and mouse, we used 9,488 genes for the genomic average (including 1,469 brain-expressed genes). In this set of reference genes—like for the brain-expressed genes—Ka/Ks ratios for primates were greater than that for mouse (0.161 and 0.150 versus 0.130,  $p < 10^{-3}$ ; see Table 2). Thus, the accelerated protein evolution reported in Figure 2A (see also Table 2) is a genome-wide phenomenon. When we take the Ka/Ks ratio of brain-expressed genes,  $[Ka/Ks]_B$ , divided by that of the genome average,  $[Ka/Ks]_G$ , the ratios are 75.8%, 75.3%, and 70.8% in the lineages of human, OWM, and mouse, respectively. Calibrated against the genome average, brain-expressed genes may indeed have evolved faster in primates than in the lineage to mouse.

However, the large phylogenetic distance between rodents and primates makes this estimation less robust and less interpretable than the differences between the two primates. Between them, there is no sign of acceleration in the human lineage.

We computed the Ka/Ks ratios along the lineages to human, chimpanzee, and OWM. There are currently two large sets of chimpanzee sequences—the Chimpanzee Sequencing and Analysis Consortium (“Consortium”) sequences [19] and the Celera sequences [20]. When either dataset is used as the benchmark for the genomic average, the results agree qualitatively. The quantitative differences have turned out to be informative (see below), and they, again, illustrate the importance of calibration against the genomic average. For each dataset, we selected the chimpanzee genes that overlap with the OWM and human datasets for comparison (see Materials and Methods).

**The Consortium sequences.** In this dataset, the genomic averages of Ka/Ks in human and chimpanzee were both higher than that in OWM (0.219 and 0.213 versus 0.172,  $p < 10^{-3}$ ; Table 3). The acceleration in the genomic average matches that in the brain-expressed genes such that the brain/genome ratios ( $[Ka/Ks]_B/[Ka/Ks]_G$ ) are all around 75%. In this comparison, the brain/genome ratio in the human lineage (72.6%) is weakly and insignificantly ( $p = 0.18$ ) lower than those in the other two lineages.

**The Celera sequences.** In this dataset, the  $([Ka/Ks]_B/[Ka/Ks]_G)$  ratios in the human, chimpanzee, and OWM lineages were 61.5%, 75.5%, and 90.8%, respectively ( $p < 10^{-2}$  in human-chimpanzee comparison), as shown in Table 4. Note that the set of brain-expressed genes is not the same as that in Table 3 because the two sets of chimpanzee sequences have different overlaps with our collection of brain-expressed genes. The slowdown in the brain/genome ratio in humans is pronounced, as seen in Table 4.

**The combined analysis of the Consortium and Celera datasets.** The differences between the two sets are largely due to gene selection, as the overlap is modest. Furthermore, for the same genes, the Celera dataset sometimes does not include all the exons. With respect to quality control, low-quality bases (quality score  $< 20$ ) were masked for Consortium sequences, but quality scores are not available for Celera sequences. Nevertheless, because the Celera sequences have slightly lower Ks values, the differences cannot be attributed to possible higher error rates in that dataset.

The reason for the seemingly inconsistent results between the two datasets is due primarily to the differential inclusion

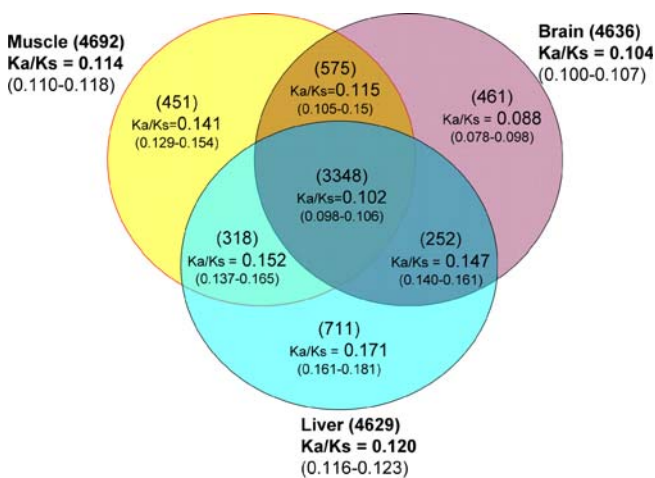

**Figure 1.** The Ka/Ks Ratios between Human and Mouse for Genes Expressed in Brain, Liver, and/or Muscle

The number of genes is given in parentheses above each Ka/Ks value; the 95% confidence interval is given in parentheses below each Ka/Ks value. Expression data for brain and liver were from Enard et al. [5], and data from muscle were from Public Expression Profiling Resource (<http://pepr.cnmcresearch.org>).

doi:10.1371/journal.pbio.0050013.g001

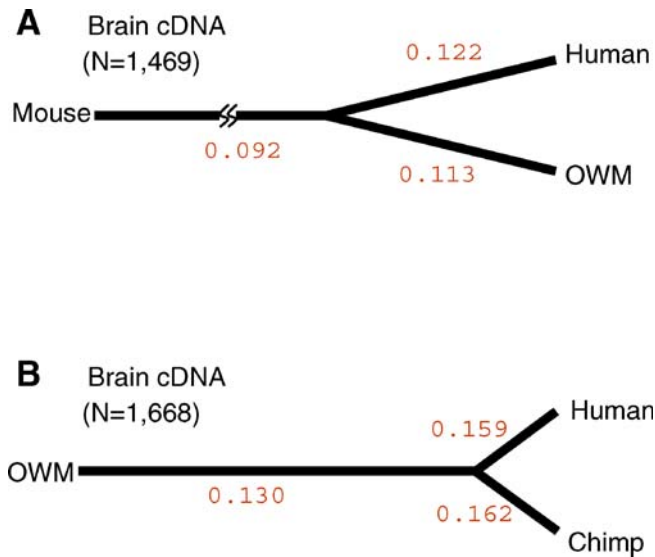

**Figure 2.** Lineage-Specific Ka/Ks Ratios for Brain-Expressed cDNAs  
The Ka and Ks values along each branch were calculated by the PAML method [18], and the Ka/Ks ratios are given.  
(A) There were 1,469 brain-expressed genes common to human, OWM, and mouse.  
(B) There were 1,668 brain-expressed genes common to human, chimpanzee, and OWM.  
For details, see Tables 2 and 3.  
doi:10.1371/journal.pbio.0050013.g002

of very slowly evolving genes along the human and chimpanzee lineages ( $K_a < 0.002$ ). In the Celera dataset, genes with  $K_a = 0$  are overrepresented, compared with the Consortium dataset, whereas the overrepresentation is reversed for genes with  $0 < K_a < 0.002$  (Figure S2). Among these genes, stochastic fluctuation is probably too large to reveal any lineage effect between human and chimpanzee. Indeed, when these very slowly evolving genes are removed from the analysis, the discrepancy disappears. In Table 5, we show the analysis of the combined Celera/Consortium datasets, consisting of genes with  $K_a > 0.002$ . The brain/genome ratios in Ka/Ks for the human, chimpanzee, and OWM lineages are, respectively, 62.9%, 69.6%, and 72.1% (Table 5).

In summary, calibrated against the genomic average, brain-

expressed genes in humans have evolved somewhat more slowly than those in other primates. This difference appears to be more pronounced among the more conservative genes.

## Discussion

A previous report [12] on the accelerated evolution of brain-expressed genes in species with more advanced brains may have been confounded by the fact that these species tend to show an even greater acceleration among all genes in the genome. This general trend is not entirely surprising. For example, compared with rodents, primates are likely to have smaller effective population size, and selection against slightly deleterious amino acid changes would be less effective in primates [21,22]. An increase in the Ka/Ks value across the genome is thus expected. Another study of a set of 201 brain genes [17] also reported more nonsynonymous substitutions in the human lineage than in the chimpanzee lineage, although the difference was not significant and was not calibrated against synonymous changes.

What then may account for the slow sequence evolution among brain-expressed genes, when calibrated against the genomic average, in species with more advanced brains? We shall first discuss potential biases in the observations, then we will address this question.

First, our sampling might be biased toward more abundantly transcribed genes; such highly expressed genes may be slowly evolving [10]. We used two different sources of expression studies to correlate the Ka/Ks ratios of genes and their expression levels. In both cases, the correlation coefficient was very low, with  $R^2 \leq 0.01$  (see Protocol S1 for details). Furthermore, in the comparisons shown in Figure 1, genes were chosen from brain, liver, and muscle by the same expression criteria, and yet brain-expressed genes were still the most slowly evolving ones.

Second, sampling of brain-expressed genes could have been biased toward certain categories of genes, which may happen to be slowly evolving. For example, housekeeping genes, which generally evolve slowly, might be disproportionately represented in our collection. In Figure S1, the slowdown was observed across all known categories of genes, thus alleviating this concern.

Another potential concern is the differences between

**Table 2.** Ka and Ks Values in the Human, OWM, and Mouse Lineages as Shown in Figure 2A

| Category                             | Variable <sup>a</sup>                      | Human    | OWM      | Mouse       |
|--------------------------------------|--------------------------------------------|----------|----------|-------------|
| Brain-expressed cDNA ( $n = 1,469$ ) | Ka                                         | 0.0034   | 0.0038   | 0.0489      |
|                                      | (A)                                        | (3,532)  | (3,904)  | (50,213)    |
|                                      | Ks                                         | 0.0278   | 0.0337   | 0.5306      |
|                                      | (S)                                        | (10,108) | (12,258) | (193,231)   |
|                                      | [Ka/Ks] <sub>B</sub>                       | 0.122    | 0.113    | 0.092**     |
| Genome average ( $n = 9,448$ )       | Ka                                         | 0.0052   | 0.0057   | 0.0763      |
|                                      | (A)                                        | (36,825) | (39,997) | (535,820)   |
|                                      | Ks                                         | 0.0323   | 0.0380   | 0.5882      |
|                                      | (S)                                        | (79,655) | (93,589) | (1,450,000) |
|                                      | [Ka/Ks] <sub>C</sub>                       | 0.161    | 0.150    | 0.130***    |
|                                      | [Ka/Ks] <sub>B</sub> /[Ka/Ks] <sub>C</sub> | (75.8%)  | (75.3%)  | (70.8%)     |

<sup>a</sup>(A) indicates total number of nonsynonymous substitutions; (S) indicates total number of synonymous substitutions.

\*\* $p < 0.01$ ; \*\*\* $p < 0.001$ ; comparison of the mouse lineage with either the human or OWM lineage (Wilcoxon rank-sum nonparametric test [37]).

doi:10.1371/journal.pbio.0050013.t002

**Table 3.** Ka and Ks Values in the Human, Chimpanzee, and OWM Lineages as Shown in Figure 2B

| Category                                   | Variable <sup>a</sup> | Human    | Chimpanzee | OWM                  |
|--------------------------------------------|-----------------------|----------|------------|----------------------|
| Brain-expressed cDNA ( <i>n</i> = 1,668)   | Ka                    | 0.00086  | 0.00088    | 0.00706              |
|                                            | (A)                   | (904)    | (924)      | (7,417)              |
|                                            | Ks                    | 0.00540  | 0.00544    | 0.05427              |
|                                            | (S)                   | (2,112)  | (2,127)    | (21,217)             |
|                                            | [Ka/Ks] <sub>B</sub>  | 0.159    | 0.162      | 0.130 <sup>***</sup> |
| Genome average ( <i>n</i> = 14,204)        | Ka                    | 0.00136  | 0.00129    | 0.01050              |
|                                            | (A)                   | (12,125) | (11,505)   | (93,927)             |
|                                            | Ks                    | 0.00621  | 0.00607    | 0.06109              |
|                                            | (S)                   | (20,216) | (19,785)   | (198,994)            |
|                                            | [Ka/Ks] <sub>G</sub>  | 0.219    | 0.213      | 0.172 <sup>***</sup> |
| [Ka/Ks] <sub>B</sub> /[Ka/Ks] <sub>G</sub> |                       | (72.6%)  | (76.1%)    | (75.6%)              |
| (Standard deviation)                       |                       | (3.7%)   | (4.4%)     | (2.8%)               |
| <i>p</i> -Value (versus human)             |                       | —        | 0.181      | 0.182                |

Genes were chosen from the overlap among OWM, human, and Consortium chimpanzee datasets. Standard deviation was calculated based on 10,000 bootstrap resamplings (see Materials and Methods).

<sup>a</sup>(A) indicates total number of nonsynonymous substitutions; (S) indicates total number of synonymous substitutions.

\*\*\*, *p* < 0.001; comparison of the OWM lineage to either the human or chimpanzee lineage (Wilcoxon rank-sum nonparametric test [37]).

doi:10.1371/journal.pbio.0050013.t003

tissue-expressed and tissue-specific genes. One might argue that the accelerated morphological changes in the human brain could be correlated with the accelerated evolution of only brain-specific (but not all brain-expressed) genes. Positive selection probably works most effectively on tissue-specific genes, as there would be fewer conflicting requirements among tissues to meet. Indeed, positive selection probably accounts for the rapid evolution of genes specifically expressed in male reproductive tissues [7,23]. However, brains appear to be different, as brain-specific genes evolved even more slowly than brain-expressed genes between human and mouse (see Figure 1). We also analyzed 262 brain-specific genes in primates (from <http://www.hugeindex.org>) [8]. As shown in Table S3, brain-specific genes evolved even more slowly than brain-expressed genes in each of the lineages to macaque, chimpanzee, and human.

When tissue-specific genes evolve more slowly than the rest

of the genome, the explanation is most likely a stronger selective constraint in that tissue. In such a case, all genes expressed in that tissue should experience some of those constraints. Brain-expressed and brain-specific genes may all be slowly evolving for reasons of shared constraints. It seems possible that the stronger selective pressure on brain-expressed genes is the consequence of the higher complexity of the biochemical network in the brain [9]. Studies from yeast and nematode also showed that proteins with more interacting partners evolved more slowly ([24,25], but see [26]). The increase in selective pressure could result from a more diverse biochemical environment of the brain. Mutations would not be tolerated if they disrupted the existing interactions [27,28].

While human cerebral cortex is severalfold larger than that of chimpanzee, it contains only 50% more neurons [1,29]. As RNA abundance is relatively constant per gram of brain

**Table 4.** Ka and Ks Values in the Human, Chimpanzee, and OWM Lineages

| Category                                   | Variable <sup>a</sup> | Human   | Chimpanzee        | OWM                  |
|--------------------------------------------|-----------------------|---------|-------------------|----------------------|
| Brain-expressed cDNA ( <i>n</i> = 992)     | Ka                    | 0.00059 | 0.00078           | 0.00723              |
|                                            | (A)                   | (284)   | (379)             | (3,494)              |
|                                            | Ks                    | 0.00529 | 0.00527           | 0.05588              |
|                                            | (S)                   | (948)   | (945)             | (10,013)             |
|                                            | [Ka/Ks] <sub>B</sub>  | 0.112   | 0.148             | 0.129                |
| Genome average ( <i>n</i> = 4,840)         | Ka                    | 0.00103 | 0.00113           | 0.00837              |
|                                            | (A)                   | (2,108) | (2,315)           | (17,140)             |
|                                            | Ks                    | 0.00566 | 0.00577           | 0.05888              |
|                                            | (S)                   | (4,260) | (4,338)           | (44,296)             |
|                                            | [Ka/Ks] <sub>G</sub>  | 0.182   | 0.196             | 0.142 <sup>***</sup> |
| [Ka/Ks] <sub>B</sub> /[Ka/Ks] <sub>G</sub> |                       | (61.5%) | (75.5%)           | (90.8%)              |
| (Standard deviation)                       |                       | (4.9%)  | (5.8%)            | (4.4%)               |
| <i>p</i> -Value (versus human)             |                       | —       | <10 <sup>-2</sup> | <10 <sup>-4</sup>    |

Genes were chosen from the overlap among OWM, human, and Celera chimpanzee datasets. Standard deviation was calculated based on 10,000 bootstrap resamplings (see Materials and Methods).

<sup>a</sup>(A) indicates total number of nonsynonymous substitutions; (S) indicates total number of synonymous substitutions.

\*\*\*, *p* < 0.001; comparison of the OWM lineage to either the human or chimpanzee lineage (Wilcoxon rank-sum nonparametric test [37]).

doi:10.1371/journal.pbio.0050013.t004

**Table 5.** Ka and Ks Values in the Human, Chimpanzee, and OWM Lineages

| Category                                                | Variable <sup>a</sup> | Human    | Chimpanzee        | OWM       |
|---------------------------------------------------------|-----------------------|----------|-------------------|-----------|
| Brain-expressed cDNA ( <i>n</i> = 1,753)                | Ka                    | 0.00086  | 0.00095           | 0.00750   |
|                                                         | (A)                   | (809)    | (896)             | (7,075)   |
|                                                         | Ks                    | 0.00552  | 0.00561           | 0.05483   |
| Genome average ( <i>n</i> = 12,126)                     | (S)                   | (1,933)  | (1,967)           | (19,216)  |
|                                                         | [Ka/Ks] <sub>B</sub>  | 0.156    | 0.169             | 0.137***  |
|                                                         | Ka                    | 0.00156  | 0.00151           | 0.01161   |
|                                                         | (A)                   | (10,645) | (10,266)          | (79,241)  |
| [Ka/Ks] <sub>B</sub> /[Ka/Ks] <sub>G</sub> <sup>b</sup> | Ks                    | 0.00630  | 0.00618           | 0.06122   |
|                                                         | (S)                   | (15,722) | (15,423)          | (152,686) |
|                                                         | [Ka/Ks] <sub>G</sub>  | 0.247    | 0.243             | 0.190***  |
| (Standard deviation)                                    | (62.9%)               | (69.6%)  | (72.1%)           |           |
| <i>p</i> -Value (versus human)                          | (4.0%)                | (4.4%)   | (3.1%)            |           |
|                                                         | —                     | 0.047    | <10 <sup>-2</sup> |           |

Genes were chosen from the combined Consortium/Celera chimpanzee sequences. Standard deviation was calculated based on 10,000 bootstrap resamplings (see Materials and Methods).

<sup>a</sup>(A) indicates total number of nonsynonymous substitutions; (S) indicates total number of synonymous substitutions.

<sup>b</sup>The calibration was done against the Consortium dataset after removing genes with *Ka* < 0.002 in brain and genome-wide collections.

\*\*\*, *p* < 0.001; comparison of the OWM lineage to either the human or chimpanzee lineage (Wilcoxon rank-sum nonparametric test [37]).

doi:10.1371/journal.pbio.0050013.t005

tissue [29], transcript abundance per neuron must be greater in the human than in the chimpanzee brain. Moreover, in microarray comparisons, extensive expression upregulation in the human brain was observed [5,11]. On the basis of individual neurons of the brain, humans may indeed have a more active, or even more complex, transcription profile than chimpanzees.

We suggest that such abundant and complex transcription may increase gene–gene interactions and constrain CDS evolution. Can this constraint of complex interactions then be compatible with the apparent rapid evolution in the expression of brain genes in humans [29]? The mechanistic basis for protein–protein interaction driving protein sequence evolution may be quite different from that of protein–DNA interaction driving expression profile differentiation. Guss et al. [30] presented a case where a change in the protein sequence of a selector gene could change the expression of the entire regulatory network. This type of large-scale trans-regulation may be a characteristic of brain-expressed genes. In Protocol S1, we compare the level of nucleotide changes associated with expression differences in genes. Table S4 suggests that brain-expressed genes may be under more extensive trans-regulation than their liver counterparts.

Our results do not contradict the finding of accelerated amino acid changes in some brain-expressed genes [6,31,32]. Deviations from the general trend are expected. In fact, these deviations may be the most interesting cases. It has often been postulated that evolution in regulatory signals, rather than in CDSs, characterizes species divergence [33]. While the generality of this postulate remains unproven [34], the evolution of the human brain may be a relevant example.

## Materials and Methods

Details on the construction of 5′-end oligo-capped brain cDNA libraries, clone sorting and selection, and cDNA sequencing are given in Protocol S1.

**Microarray analysis.** The CEL files of brain and liver were obtained from Enard et al. [5] (<http://email.eva.mpg.de/~khaitovi/supplement1>).

html). The CEL files of human muscle were obtained from Public Expression Profiling Resource ([http://pepr.cnmcresearch.org/browse.do?action=list\\_ptrj\\_exp&projectId=132](http://pepr.cnmcresearch.org/browse.do?action=list_ptrj_exp&projectId=132)). Presence or absence of genes on arrays was evaluated at *p* = 0.05 using the Affymetrix PMM analysis (<http://www.affymetrix.com>). A gene was defined as “expressed” in a particular tissue if it was “present” in at least half of the hybridizations. The mouse homologs of genes expressed in human brain, liver, and muscle were downloaded from ENSEMBL (<http://www.ensembl.org>). The 95% confidence intervals of Ka/Ks ratios were estimated by the bootstrap method. Numbers of genes resampled are based on the size of each of seven categories (Figure 1); 10,000 resamplings with replacement were performed, and Ka/Ks ratios were estimated.

**Sequence analysis.** Human and mouse CDSs were downloaded from ENSEMBL (Ensembl 35). We used two sets of chimpanzee sequences in this study. The chimpanzee genome sequences were from the Consortium dataset (<http://hgdownload.cse.ucsc.edu/downloads.html>) [19], and the 7,665 chimpanzee CDSs were from the Celera dataset (“Supporting Online Material” of [20], available at <http://www.sciencemag.org/cgi/content/full/302/5652/1960/DC1>). Genome sequence of rhesus monkey (*M. mulatta*) was downloaded from the Human Genome Sequencing Center (<http://www.hgsc.bcm.tmc.edu>). Genome data from rhesus monkey were used instead of genome data from cynomolgus monkey (*M. fascicularis*) simply because there are no genome data available for the latter. Nevertheless, both species belong to the OWM group and should be equal distance from apes. The CDSs of chimpanzee (Consortium) and rhesus monkey were then extracted from the genome sequences based on the annotation downloaded from <http://hgdownload.cse.ucsc.edu/downloads.html>. Bases with quality score < 20 were masked for further analysis. For genes with multiple transcripts, only the longest transcript was retained and used.

For the pairwise comparisons in Table 1, human and mouse CDSs were cross-blasted in blastp searches. The best hits from both blast results were treated as orthologs. Human and OWM (*M. mulatta*) CDSs were also cross-blasted, but using blastn instead. OWM CDSs with non-triplet indels were excluded (1,096 CDSs) from further analyses as their ability to be transcribed/translated is not certain. In total, 12,052 human/mouse and 14,204 human/OWM orthologous pairs were identified and served as genome-wide comparisons. Next, brain cDNAs of *M. fascicularis* were used as the template to blast the non-redundant (NR) NCBI database (<http://www.ncbi.nlm.nih.gov/BLAST>). We chose the putative orthologs of human that had the highest score and lowest *E* value in the blast search. The CDSs of *M. fascicularis* were then extracted based on the annotation of human CDSs. Of 2,498 putative human/*M. fascicularis* orthologous pairs, 2,077 of them had identifiable mouse homologs based on human/mouse cross-blast search as described above. These gene pairs were considered brain-expressed genes.

The OWM sequences used in three-species comparisons (human–

OWM–mouse and human–chimpanzee–OWM) were from rhesus monkey (*M. mulatta*), and brain-expressed genes were identified from putative *M. fascicularis*/*M. mulatta* ortholog pairs. To construct the alignment of human–OWM (*M. mulatta*)–mouse trios, the CDSs of putative orthologs from the three species were translated and aligned using ClustalW [35], and back-translated to their corresponding DNA sequences using TRANSALIGN software from the EMBOSS package [36]. Of 9,448 aligned human–OWM–mouse trios, 1,469 were putative orthologs of brain cDNAs derived from *M. fascicularis*; these were treated as brain-expressed genes.

For human–chimpanzee (Consortium)–OWM trios, Consortium chimpanzee CDSs were cross-blasted with human and OWM CDSs in blastn searches. Only the genes consistently showing the highest score and lowest *E* value in all three-way searches (human–OWM, chimpanzee–OWM, and human–chimpanzee) were retained as putative orthologs. Human–chimpanzee (Consortium)–OWM trios were aligned as described above. In total, 14,204 genes were aligned, including 1,668 brain-expressed genes. For human–chimpanzee (Celera)–OWM trios, chimpanzee CDSs derived from Clark et al. [20] were used. The gaps in Celera chimpanzee sequences were masked with “N” and aligned with human and OWM sequences. Total numbers of aligned and brain-expressed genes in this dataset were 4,840 and 992, respectively.

We calculated the Ka and Ks values for each putative pair of orthologs using PAML [18]. Ka and Ks were estimated jointly for each ortholog using codeml with the F3x4 codon frequency model and M1 model for variable  $\omega$  based on the unrooted tree. For a set of genes, Ka/Ks was calculated by summing the number of substitutions and the number of sites to obtain Ka and Ks for the concatenated set before taking the ratio.

**Statistics.** To test whether the substitution rates are significantly different between any two sets of genes, we applied the log-linear model with the quassipoisson family and default log link function. The model formula is as follows:

$$E(\log(Y_i)) = \beta_0 + \beta_1 \delta + \log(X_i)$$

$Y_i$  and  $X_i$  denote the number of substitutions and sites for each gene, respectively. In the model,  $\log(X_i)$  is usually called offset.  $\delta$  is the indication function;  $\delta = 1$  if a gene is brain expressed, and  $\delta = 0$  if it is not. The null hypothesis is that  $\beta_1$  is not significantly different from zero. Using this model, we tested Ka/Ks for the brain-expressed genes versus the genome-wide collection (Table 1) and divergence of promoter regions for brain- versus liver-expressed genes (Table S4). Genes recovered from different brain regions were compared by the same method (Table S2).

To test the differences in  $[Ka/Ks]_B/[Ka/Ks]_G$  between human and chimpanzee, we resampled equal numbers of genes from the genomes. For example, 1,668 and 1,753 genes were resampled for Tables 3 and 5, respectively, from 14,204 and 12,126 genes collected genome-wide, respectively. For Table 4, 992 genes were randomly picked from the 4,840 genes. The average Ka/Ks values of the resampled data were calculated and divided by  $[Ka/Ks]_G$  for each of 10,000 resamplings. The mean and standard deviation of  $[Ka/Ks]_{\text{resampled}}/[Ka/Ks]_G$  were calculated for both human and chimpanzee, and the percentages of their differences were compared with the observed differences between the two species.

The Wilcoxon rank-sum nonparametric test [37] was applied to determine whether the average Ka/Ks ratios are significantly different between lineages.

## Supporting Information

**Figure S1.** The Ka/Ks Ratios for Genes in Different Functional Categories

The average Ka/Ks ratios of brain-expressed genes belonging in each of the 19 functional categories listed in Table 1 were calculated for the human–OWM and human–mouse comparisons. Genes from the

whole genome comparison between human and mouse were adopted from Waterston et al. [38]. Note that the differences are consistent across all functional categories.

Found at doi:10.1371/journal.pbio.0050013.sg001 (712 KB DOC).

**Figure S2.** Distribution of Ka in the Lineages Leading to Great Apes (Human + Chimpanzee) for Brain-Expressed Genes in Consortium and Celera Datasets

Found at doi:10.1371/journal.pbio.0050013.sg002 (27 KB DOC).

**Protocol S1.** Supplementary Materials and Methods

Found at doi:10.1371/journal.pbio.0050013.sd001 (69 KB DOC).

**Table S1.** Functional Categorization of the 2,498 Protein-Coding Genes Expressed in the Brain of OWM

The 2,498 genes expressed in the OWM brain are categorized according to their functions using the Panther system [39]. Only the top 19 categories in transcript abundance are shown. The percentage in parentheses is the ratio of the number of brain-expressed genes to that of all genes belonging to the same category.

Found at doi:10.1371/journal.pbio.0050013.st001 (37 KB DOC).

**Table S2.** Ka and Ks Values for Genes Expressed in Different Regions of the Brain

Found at doi:10.1371/journal.pbio.0050013.st002 (31 KB DOC).

**Table S3.** Ka and Ks Values of Brain-Specific Genes in the Human, Chimpanzee, and OWM Lineages as Shown in Figure 2B

Information on tissue specificity was originally from <http://www.hugeindex.org> and was used in a previous study [8]. In the present study, our sequenced brain cDNAs cover only 262 brain-specific genes.

Found at doi:10.1371/journal.pbio.0050013.st003 (27 KB DOC).

**Table S4.** Level of Nucleotide Divergence (in Percent) in the 5'-Region of Genes with Greater than 20% or 40% Expression Difference between Human and Chimpanzee

The average 5'-region divergence for all genes in the genome is given for comparison.

Found at doi:10.1371/journal.pbio.0050013.st004 (26 KB DOC).

## Accession Numbers

The sequences used in this paper can be accessed via the DNA Data Bank of Japan (<http://www.ddbj.nig.ac.jp>) under accession number AB170063–174733.

## Acknowledgments

We thank the Rhesus Macaque Genome Sequencing Consortium for allowing use of the prepublication sequence in this report. We thank T. C. Ho, Y. L. Liu, and K. M. Wu for technical support, and K. J. Tsai, H. Tang, A. Siepel, and J. Lu for comments and discussion during the study. HYW was a recipient of a postdoctoral fellowship from Academia Sinica.

**Author contributions.** KH, CKC, SFT, CIW, and CKJS conceived and designed the experiments. HYW, HCC, and NO performed the experiments. HYW, HCC, NO, and CKJS analyzed the data. KH, SS, TG, CKC, and SFT contributed reagents/materials/analysis tools. HYW, CIW, and CKJS wrote the paper.

**Funding.** This research was supported by the Academia Sinica and the National Science Council, Taiwan; the Ministry of the Health and Welfare, Japan; and US Public of Health (NIH) Grants.

**Competing interests.** The authors have declared that no competing interests exist.

## References

- Gazzaniga MS, Ivry RB, Mangun GR (2002) Cognitive neuroscience: The biology of the mind. New York: Norton. 681 p.
- Laughlin SB, Sejnowski TJ (2003) Communication in neuronal networks. Science 301: 1870–1874.
- Varki A (2004) How to make an ape brain. Nat Genet 36: 1034–1036.
- Smith AJ, Blumenfeld H, Behar KL, Rothman DL, Shulman RG, et al. (2002)

Cerebral energetics and spiking frequency: The neurophysiological basis of fMRI. Proc Natl Acad Sci U S A 99: 10765–10770.

- Enard W, Khaitovich P, Klose J, Zollner S, Heissig F, et al. (2002) Intra- and interspecific variation in primate gene expression patterns. Science 296: 340–343.
- Evans PD, Anderson JR, Vallender EJ, Gilbert SL, Malcom CM, et al. (2004) Adaptive evolution of ASPM, a major determinant of cerebral cortical size in humans. Hum Mol Genet 13: 489–494.

7. Wyckoff GJ, Wang W, Wu CI (2000) Rapid evolution of male reproductive genes in the descent of man. *Nature* 403: 304–309.
8. Zhang L, Li WH (2004) Mammalian housekeeping genes evolve more slowly than tissue-specific genes. *Mol Biol Evol* 21: 236–239.
9. Kuma K, Iwabe N, Miyata T (1995) Functional constraints against variations on molecules from the tissue level: Slowly evolving brain-specific genes demonstrated by protein kinase and immunoglobulin supergene families. *Mol Biol Evol* 12: 123–130.
10. Duret L, Mouchiroud D (2000) Determinants of substitution rates in mammalian genes: Expression pattern affects selection intensity but not mutation rate. *Mol Biol Evol* 17: 68–74.
11. Caceres M, Lachuer J, Zapala MA, Redmond JC, Kudo L, et al. (2003) Elevated gene expression levels distinguish human from non-human primate brains. *Proc Natl Acad Sci U S A* 100: 13030–13035.
12. Dorus S, Vallender EJ, Evans PD, Anderson JR, Gilbert SL, et al. (2004) Accelerated evolution of nervous system genes in the origin of *Homo sapiens*. *Cell* 119: 1027–1040.
13. Kandel ER, Schwartz JH, Jessell TM (2000) Principles of neural science. New York: McGraw-Hill Health Professions Division. 1,414 p.
14. Goldberg A, Wildman DE, Schmidt TR, Huttemann M, Goodman M, et al. (2003) Adaptive evolution of cytochrome c oxidase subunit VIII in anthropoid primates. *Proc Natl Acad Sci U S A* 100: 5873–5878.
15. Osada N, Kusuda J, Hirata M, Tanuma R, Hida M, et al. (2002) Search for genes positively selected during primate evolution by 5'-end-sequence screening of cynomolgus monkey cDNAs. *Genomics* 79: 657–662.
16. Lindblad-Toh K, Wade CM, Mikkelsen TS, Karlsson EK, Jaffe DB, et al. (2005) Genome sequence, comparative analysis and haplotype structure of the domestic dog. *Nature* 438: 803–819.
17. Khaitovich P, Hellmann I, Enard W, Nowick K, Leinweber M, et al. (2005) Parallel patterns of evolution in the genomes and transcriptomes of humans and chimpanzees. *Science* 309: 1850–1854.
18. Yang Z (1997) PAML: A program package for phylogenetic analysis by maximum likelihood. *Comput Appl Biosci* 13: 555–556.
19. Chimpanzee Sequencing and Analysis Consortium (2005) Initial sequence of the chimpanzee genome and comparison with the human genome. *Nature* 437: 69–87.
20. Clark AG, Glanowski S, Nielsen R, Thomas PD, Kejariwal A, et al. (2003) Inferring nonneutral evolution from human-chimp-mouse orthologous gene trios. *Science* 302: 1960–1963.
21. Ohta T (1973) Slightly deleterious mutant substitutions in evolution. *Nature* 246: 96–98.
22. Kimura M (1962) On the probability of fixation of mutant genes in a population. *Genetics* 47: 713–719.
23. Swanson WJ, Clark AG, Waldrip-Dail HM, Wolfner MF, Aquadro CF (2001) Evolutionary EST analysis identifies rapidly evolving male reproductive proteins in *Drosophila*. *Proc Natl Acad Sci U S A* 98: 7375–7379.
24. Fraser HB, Hirsh AE, Steinmetz LM, Scharfe C, Feldman MW (2002) Evolutionary rate in the protein interaction network. *Science* 296: 750–752.
25. Fraser HB, Wall DP, Hirsh AE (2003) A simple dependence between protein evolution rate and the number of protein-protein interactions. *BMC Evol Biol* 3: 11.
26. Hahn MW, Conant GC, Wagner A (2004) Molecular evolution in large genetic networks: Does connectivity equal constraint? *J Mol Evol* 58: 203–211.
27. Hastings KE (1996) Strong evolutionary conservation of broadly expressed protein isoforms in the troponin I gene family and other vertebrate gene families. *J Mol Evol* 42: 631–640.
28. Sutcliffe JG (1988) mRNA in the mammalian central nervous system. *Annu Rev Neurosci* 11: 157–198.
29. Preuss TM, Caceres M, Oldham MC, Geschwind DH (2004) Human brain evolution: Insights from microarrays. *Nat Rev Genet* 5: 850–860.
30. Guss KA, Nelson CE, Hudson A, Kraus ME, Carroll SB (2001) Control of a genetic regulatory network by a selector gene. *Science* 292: 1164–1167.
31. Evans PD, Anderson JR, Vallender EJ, Choi SS, Lahn BT (2004) Reconstructing the evolutionary history of microcephalin, a gene controlling human brain size. *Hum Mol Genet* 13: 1139–1145.
32. Burki F, Kaessmann H (2004) Birth and adaptive evolution of a hominoid gene that supports high neurotransmitter flux. *Nat Genet* 36: 1061–1063.
33. King MC, Wilson AC (1975) Evolution at two levels in humans and chimpanzees. *Science* 188: 107–116.
34. Wu CI, Ting CT (2004) Genes and speciation. *Nat Rev Genet* 5: 114–122.
35. Thompson JD, Higgins DG, Gibson TJ (1994) CLUSTAL W: Improving the sensitivity of progressive multiple sequence alignment through sequence weighting, position-specific gap penalties and weight matrix choice. *Nucleic Acids Res* 22: 4673–4680.
36. Rice P, Longden I, Bleasby A (2000) EMBOSS: The European Molecular Biology Open Software Suite. *Trends Genet* 16: 276–277.
37. Wilcoxon F (1945) Individual comparisons by ranking methods. *Biometrics* 1: 80–83.
38. Waterston RH, Lindblad-Toh K, Birney E, Rogers J, Abril JF, et al. (2002) Initial sequencing and comparative analysis of the mouse genome. *Nature* 420: 520–562.
39. Thomas PD, Kejariwal A, Campbell MJ, Mi H, Diemer K, et al. (2003) PANTHER: A browsable database of gene products organized by biological function, using curated protein family and subfamily classification. *Nucleic Acids Res* 31: 334–341.
